# Supplementary material for: Methodological Optimization of Supercritical Fluid Extraction of Valuable Bioactive Compounds from the Acidophilic Microalga Coccomyxa onubensis
Source: MDPI journal article supplement (doi:10.3390/antiox11071248), 2022-06-25
Supplement: s1 [file s1]

# Methodological Optimization of Supercritical Fluid Extraction of Valuable Bioactive Compounds from the Acidophilic Microalga *Coccomyxa onubensis*

Mari Carmen Ruiz-Domínguez <sup>1</sup>, Elena Medina <sup>1</sup>, Francisca Salinas <sup>1</sup>, Waldo Bugeño <sup>1</sup>, Juan-Luis Fuentes <sup>2</sup>, Carlos Vílchez <sup>2</sup>, Inés Garbayo <sup>2\*</sup>, Pedro Cerezal-Mezquita <sup>1</sup>

<sup>1</sup> Laboratorio de Microencapsulación de Compuestos Bioactivos (LAMICBA), Departamento de Ciencias de los Alimentos y Nutrición, Facultad de Ciencias de la Salud, Universidad de Antofagasta, 1240000 Antofagasta, Chile

<sup>2</sup> Algal Biotechnology Group, CIDERTA and Faculty of Sciences, University of Huelva, 21007 Huelva, Spain

\* Corresponding author: <https://orcid.org/0000-0002-0656-4523>

**Supplementary material - Table S1.** Regression coefficients and p-Value for Extraction yield, Lutein purity, and Lutein recovery in their original units and statistics for the fit obtained by multiple linear regression.

| Terms of model                                 | Extraction Yield<br>(%, w/w) |         | Lutein purity<br>(mg/g extract) |         | Lutein recovery<br>(%, w/w) |         |
|------------------------------------------------|------------------------------|---------|---------------------------------|---------|-----------------------------|---------|
|                                                | Estimate                     | p-Value | Estimate                        | p-Value | Estimate                    | p-Value |
| Constant                                       | -16.1420                     |         | 24.9590                         |         | -23.3342                    |         |
| A: T.                                          | 0.3252                       | 0.0244* | -0.1472                         | 0.0113* | 0.5381                      | 0.0010* |
| B: P                                           | 0.4188                       | 0.0083* | -0.7977                         | 0.0700  | 0.7420                      | 0.2454  |
| C: EtOH %                                      | 0.4390                       | 0.0000* | 0.2390                          | 0.5327  | 0.7138                      | 0.0005* |
| T × Temp.                                      | -0.0028                      | 0.0166* | 0.0009                          | 0.8011  | -0.0091                     | 0.2630  |
| T × P                                          | 0.0004                       | 0.6926  | 0.0025                          | 0.5874  | 0.0092                      | 0.3648  |
| T × EtOH %                                     | -0.0011                      | 0.1291  | 0.0055                          | 0.0867  | 0.0270                      | 0.0046* |
| P × P                                          | -0.0048                      | 0.0193* | 0.0086                          | 0.2082  | -0.0129                     | 0.3632  |
| P × EtOH %                                     | -0.0047                      | 0.0021* | 0.0050                          | 0.2030  | -0.0001                     | 0.9898  |
| EtOH % × EtOH %                                | 0.0006                       | 0.2798  | -0.0138                         | 0.0013* | -0.0285                     | 0.0016* |
| Statistic for the goodness of fit of the model |                              |         |                                 |         |                             |         |
| R <sup>2</sup>                                 | 0.9936                       |         | 0.9364                          |         | 0.9725                      |         |
| adjusted R <sup>2</sup>                        | 0.9821                       |         | 0.8219                          |         | 0.9231                      |         |
| RSD                                            | 0.3126                       |         | 1.2589                          |         | 5.5597                      |         |
| P                                              | 0.7137                       |         | 0.9424                          |         | 0.9913                      |         |

R<sup>2</sup>–determination coefficient. adjusted R<sup>2</sup>. RSD–residual standard deviation. P-value of the lack-of-fit test for the model; \* - significant coefficients of the model. T–Temperature. P–Pressure. EtOH %–Ethanol as Co-solvent

**Supplementary material - Table S2.** Regression coefficients and p-Value for Total phenol content and antioxidant activity in their original units and statistics for the fit obtained by multiple linear regression.

| Terms of model                                 | Total Phenol Content<br>(mg GAE / g extract) |         | Antioxidant activity<br>(TEAC)<br>(mmol TE / g extract) |         |
|------------------------------------------------|----------------------------------------------|---------|---------------------------------------------------------|---------|
|                                                | Estimate                                     | p-Value | Estimate                                                | p-Value |
| Constant                                       | 4.8792                                       |         | 1.9497                                                  |         |
| A: T.                                          | 0.7968                                       | 0.0196* | -0.0094                                                 | 0.0406* |
| B: P                                           | -0.8526                                      | 0.2327  | -0.1059                                                 | 0.0129* |
| C: EtOH %                                      | 0.3422                                       | 0.1334  | 0.0092                                                  | 0.0066* |
| T × T                                          | -0.0075                                      | 0.2824  | 0.0006                                                  | 0.1906  |
| T × P                                          | 0.0012                                       | 0.8871  | -0.0013                                                 | 0.0545  |
| T × EtOH %                                     | 0.0079                                       | 0.1611  | 0.0006                                                  | 0.1048  |
| P × P                                          | 0.0093                                       | 0.4424  | 0.0022                                                  | 0.0242* |
| P × EtOH %                                     | 0.0081                                       | 0.2613  | 0.0007                                                  | 0.1478  |
| EtOH % × EtOH %                                | -0.0188                                      | 0.0054* | -0.0010                                                 | 0.0129* |
| Statistic for the goodness of fit of the model |                                              |         |                                                         |         |
| R <sup>2</sup>                                 | 0.9002                                       |         | 0.9437                                                  |         |
| adjusted R <sup>2</sup>                        | 0.7208                                       |         | 0.8423                                                  |         |
| RSD                                            | 2.3916                                       |         | 0.5337                                                  |         |
| P                                              | 0.7128                                       |         | 0.6075                                                  |         |

R<sup>2</sup>–determination coefficient. adjusted R<sup>2</sup>. RSD–residual standard deviation. P-value of the lack-of-fit test for the model; \* - significant coefficients of the model. T–Temperature. P–Pressure. EtOH %–Ethanol as Co-solvent

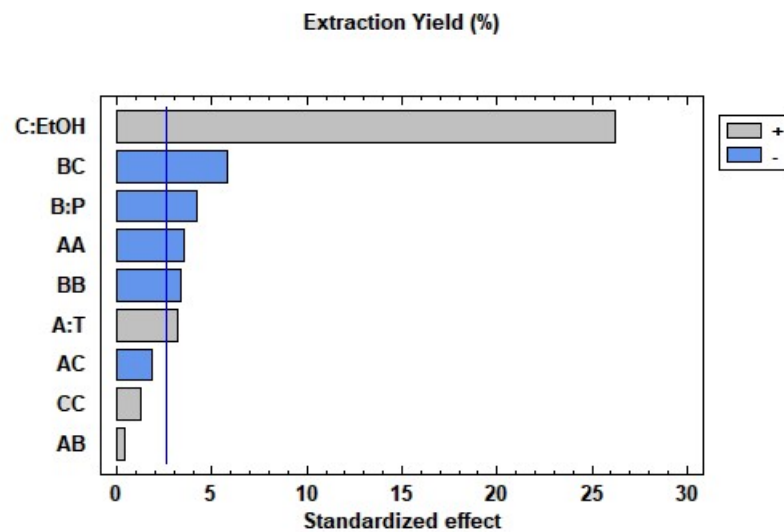

**Figure S1.** Pareto Chart of the combined effects of temperature (30–70 °C), pressure (25–55 MPa), and ethanol as co-solvent (0–50% v/v) on extraction yield from *Coccomyxa onubensis*. Abbreviation: temperature (T); pressure (P) and ethanol as co-solvent (EtOH).

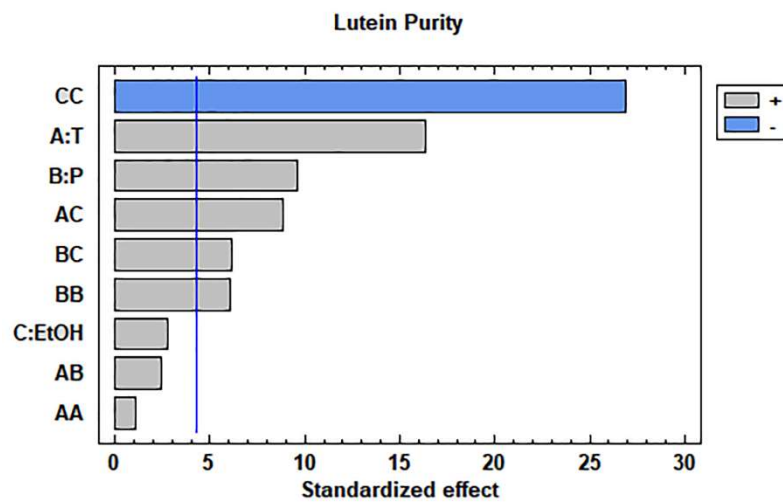

**Figure S2.** Pareto Chart of the combined effects of temperature (30–70 °C), pressure (25–55 MPa), and ethanol as co-solvent (0%–50% v/v) on lutein purity (LP) from *Coccomyxa onubensis*. Abbreviation: temperature (T), pressure (P), and ethanol as co-solvent (EtOH).

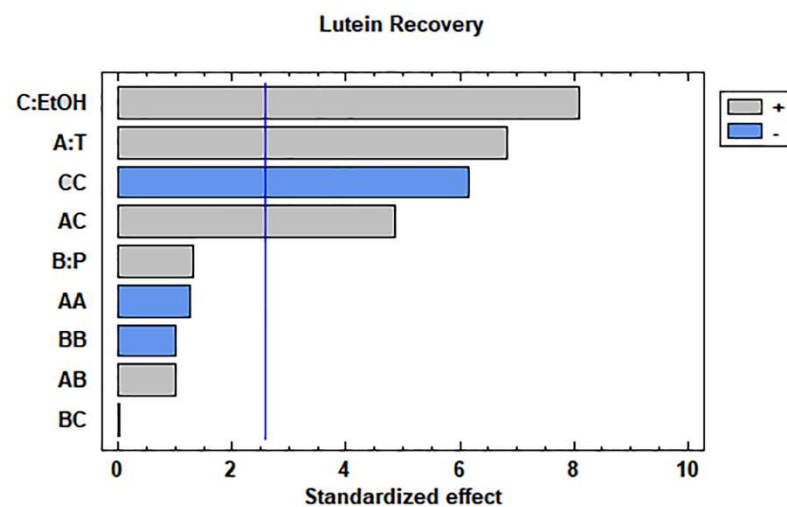

**Figure S3.** Pareto Chart of the combined effects of temperature (30–70 °C), pressure (25–55 MPa), and ethanol as co-solvent (0–50% v/v) on lutein recovery (LR) from *Coccomyxa onubensis*. Abbreviation: temperature (T), pressure (P), and ethanol as co-solvent (EtOH).

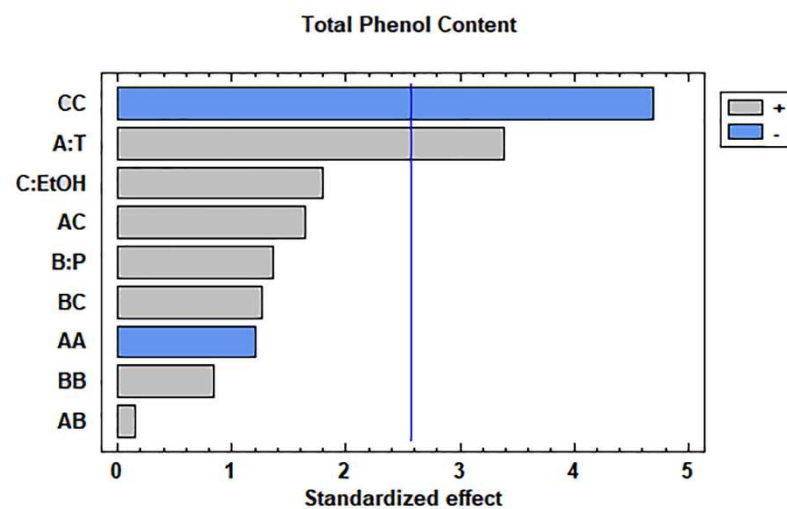

**Figure S4.** Pareto Chart of the combined effects of temperature (30–70 °C), pressure (25–55 MPa), and ethanol as co-solvent (0–50% v/v) on total phenol content (TPC) from *Coccomyxa onubensis*. Abbreviation: temperature (T), pressure (P), and ethanol as co-solvent (EtOH).

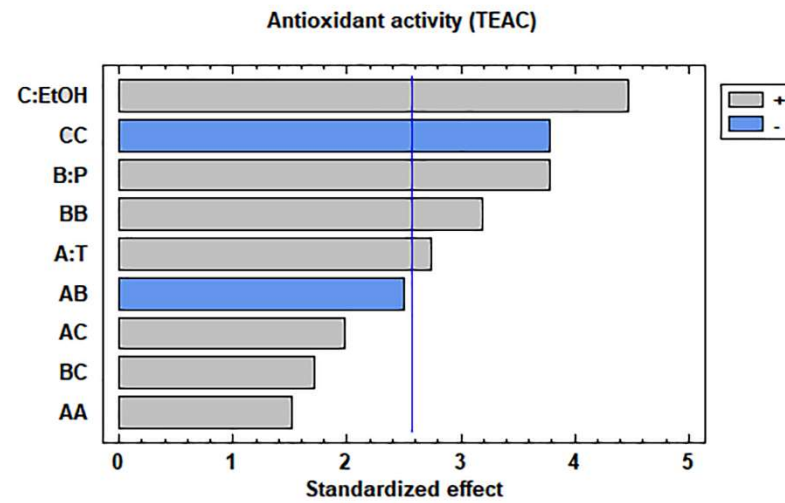

**Figure S5.** Pareto Chart of the combined effects of temperature (30–70 °C), pressure (25–55 MPa), and ethanol as co-solvent (0–50% v/v) on antioxidant capacity (TEAC) from *Coccomyxa onubensis*. Abbreviation: temperature (T), pressure (P), and ethanol as co-solvent (EtOH).
